# Supplementary material for: 2D Ta4AlC3 and Ta4C3 nanosheets with excellent ultraviolet optical limiting behavior for laser protection
Source: Royal Society of Chemistry journal article supplement (doi:10.1039/d3tc04692c), 2024-01-01
Supplement: d3tc04692c1.pdf [file d3tc04692c1.pdf]

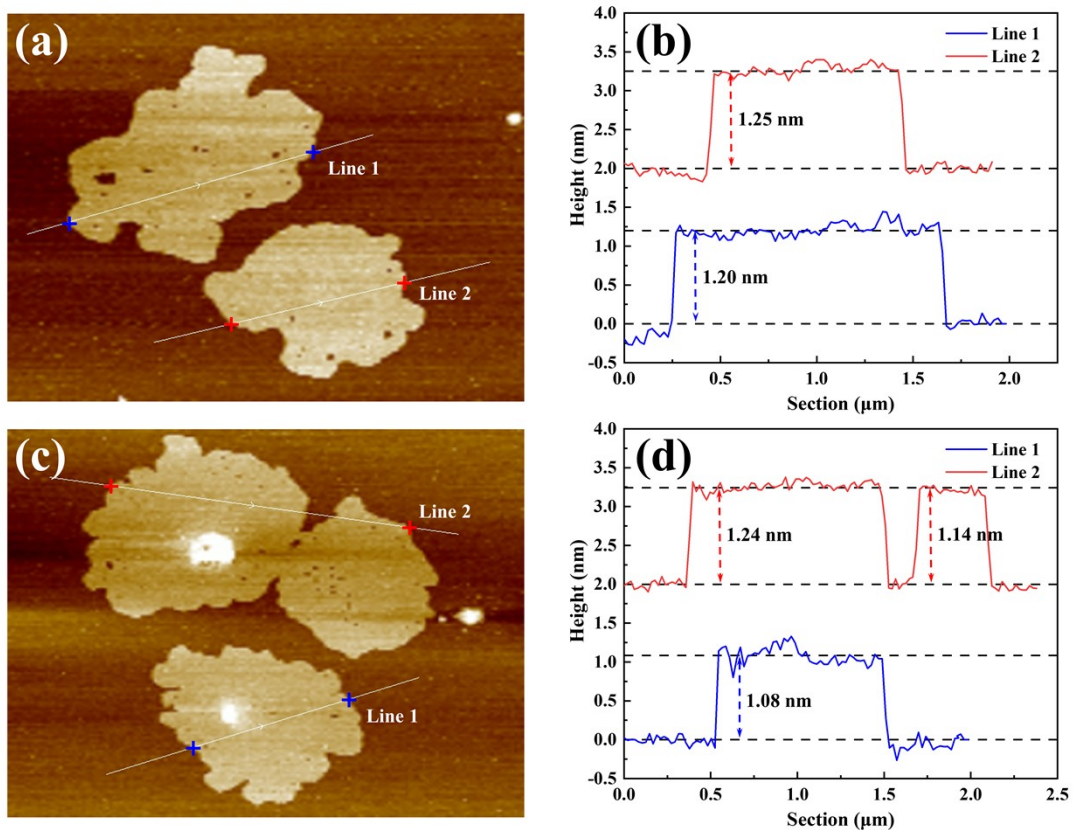

Fig. S1. AFM result of  $\text{Ta}_4\text{AlC}_3$  nanosheets and the corresponding heights of lines.

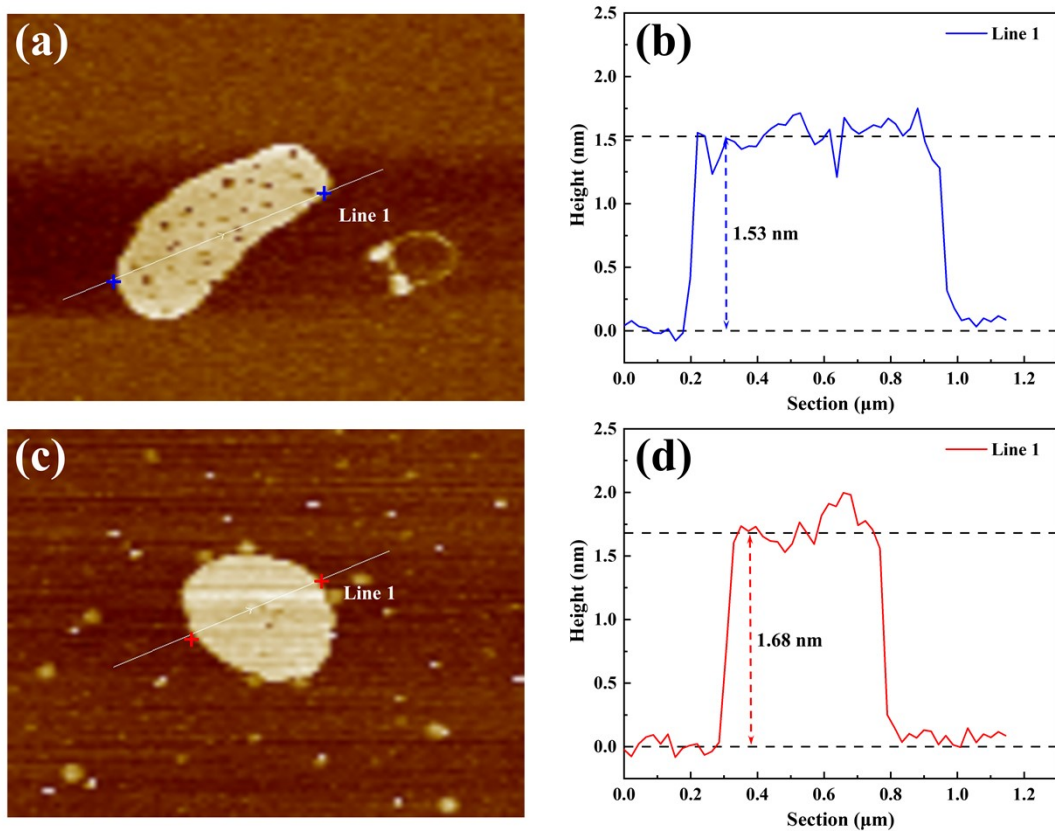

Fig. S2. AFM result of  $\text{Ta}_4\text{C}_3$  nanosheets and the corresponding heights of lines.
